# Supplementary material for: Long-term exposure to low doses of fresh and aged zinc oxide nanoparticles causes cell malignant progression enhanced by a tyrosine phosphatase SHP2 gain-of-function mutation
Source: Royal Society of Chemistry journal article supplement (doi:10.1039/c8en01191e), 2019-01-01
Supplement: c8en01191e1.pdf [file c8en01191e1.pdf]

Supplemental data

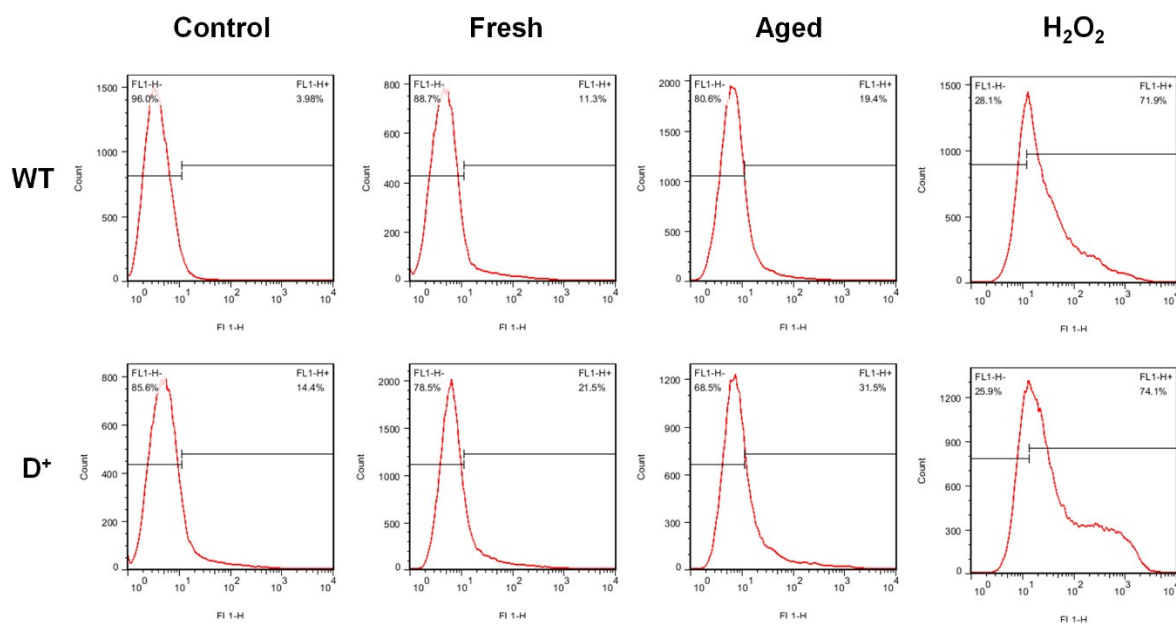

S.1 Acute exposure to ZnO NPs induced ROS generation in MEF cells. WT and D<sup>+</sup> MEF cells were treated with 10 µg/ml fresh or aged ZnO NPs for 12 h. Intracellular ROS was detected by flow cytometry as described in Methods. Note: Positive control: 0.1mM H<sub>2</sub>O<sub>2</sub> for 15 mins.

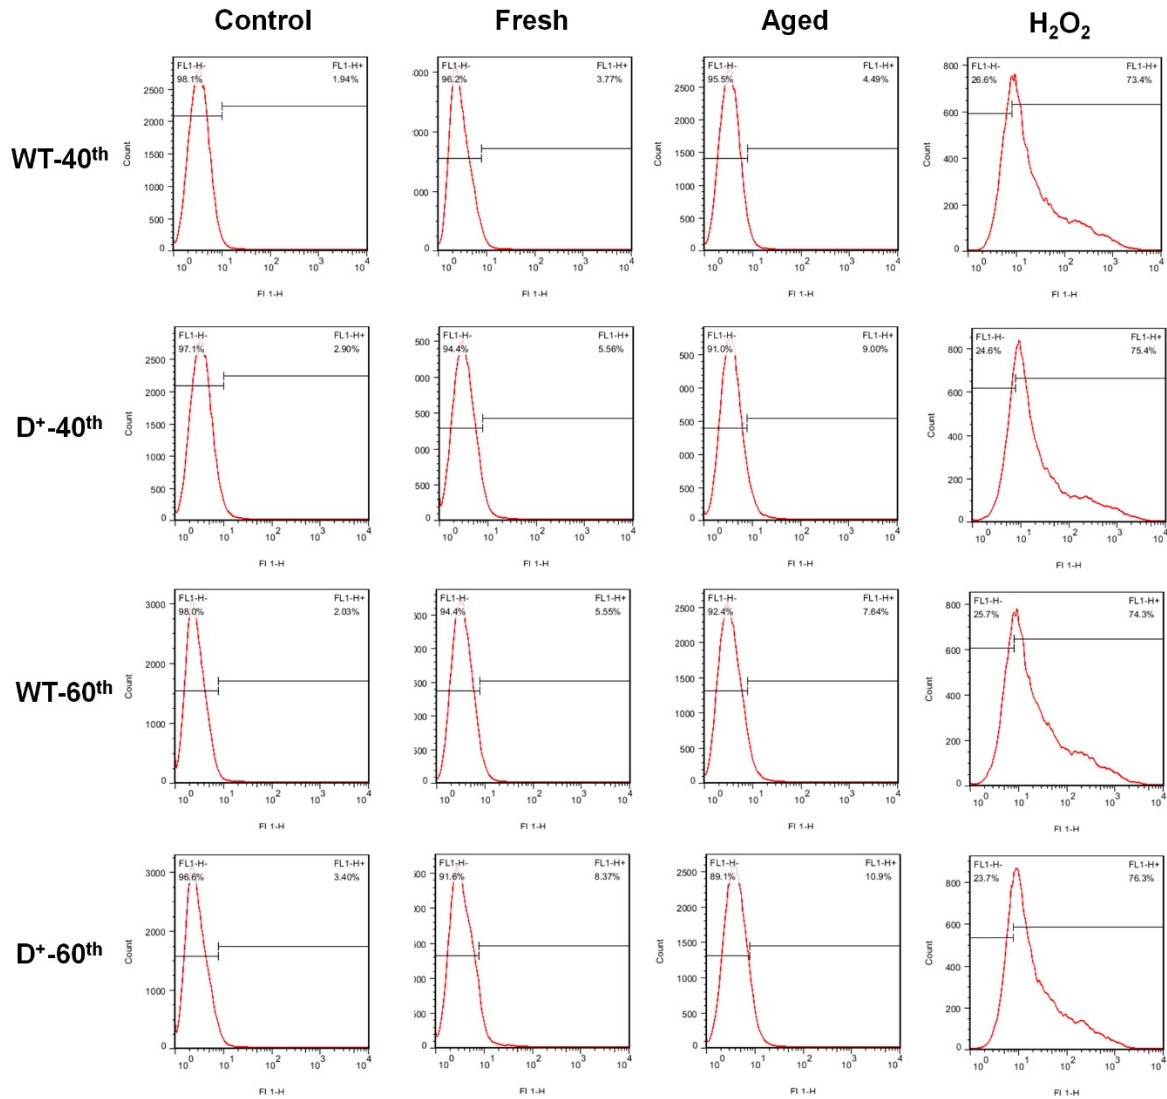

S.2 Long-term exposure to low doses of ZnO NPs induced ROS generation in MEF cells. The percentage of intracellular ROS of WT and D<sup>+</sup> MEF cells that were treated with 1.5 µg/ml fresh or aged ZnO NPs for 16 and 24 weeks. Intracellular ROS was detected by flow cytometry as described in Methods. Note: Positive control: 0.1mM H<sub>2</sub>O<sub>2</sub> for 15 mins.

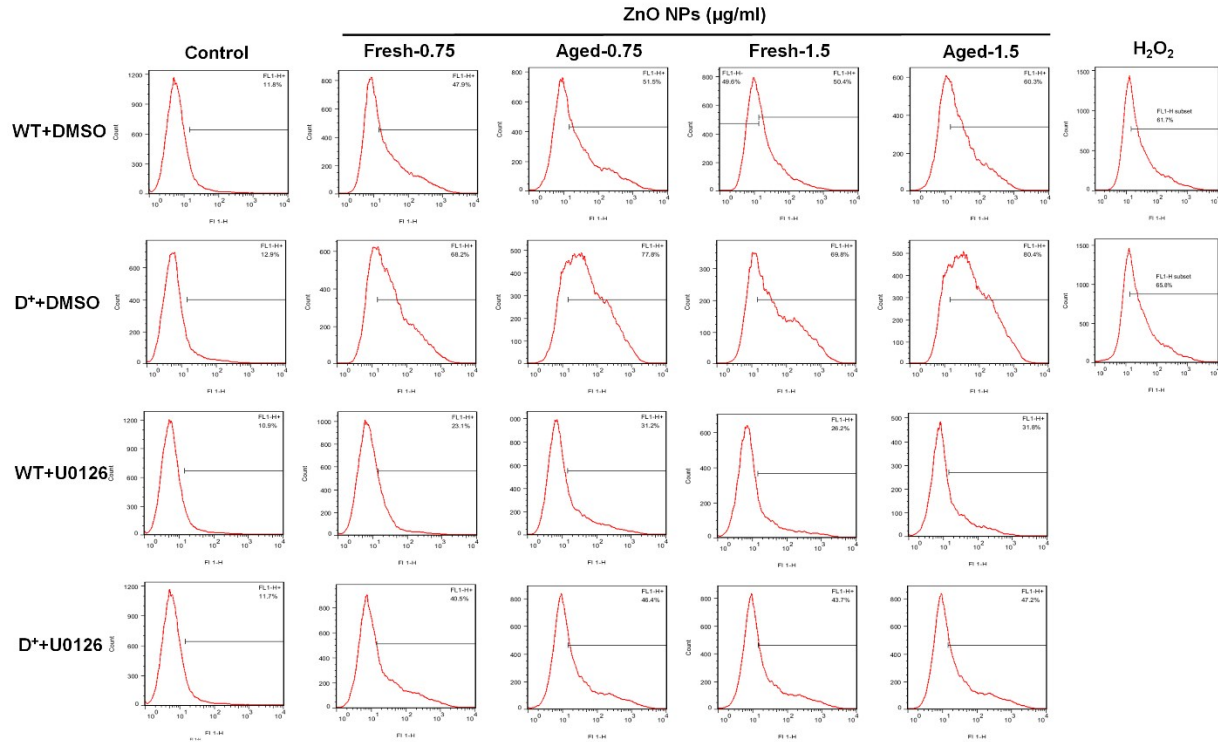

S.3 Inhibition of p-Erk activation decreased the percentage of ROS in ZnO NP-induced MEF cells. MEF cells were pretreated with 20 µM U0126 or DMSO for 6 hours and then treated with ZnO NPs for 12 hours. The percentage of ROS was measured by flow cytometry assay as described in Methods. Note: Positive control: 0.1mM H<sub>2</sub>O<sub>2</sub> for 15 mins.
